# Supplementary material for: Size and crystallinity control of two-dimensional porous cobalt oxalate thin sheets: tuning surface structure with enhanced performance for aqueous asymmetric supercapacitors
Source: Royal Society of Chemistry journal article supplement (doi:10.1039/c8dt01920g), 2018-01-01
Supplement: c8dt01920g1.pdf [file c8dt01920g1.pdf]

## Supplementary information

### **Size and Crystallinity-Control of Two-dimensional Porous Cobalt Oxalate Thin Sheets: Tuning Surface Structure with Enhanced Performance for Aqueous Asymmetric Supercapacitor**

Tao Pu,<sup>a</sup> Jie Li,<sup>a</sup> Yuqian Jiang,<sup>a</sup> Biao Huang,<sup>a</sup> Wensong Wang,<sup>a</sup> Chenglan Zhao,<sup>a</sup> Li Xie,<sup>a</sup> Lingyun Chen,<sup>a,b,\*</sup>

<sup>a</sup> School of Chemistry and Chemical Engineering, Chongqing University, Chongqing 400044, China

<sup>b</sup> National-Municipal Joint Engineering Laboratory for Chemical Process Intensification and Reaction, School of Chemistry and Chemical Engineering, Chongqing University, Chongqing 400044, China

\* E-mail: [lychen@cqu.edu.cn](mailto:lychen@cqu.edu.cn)

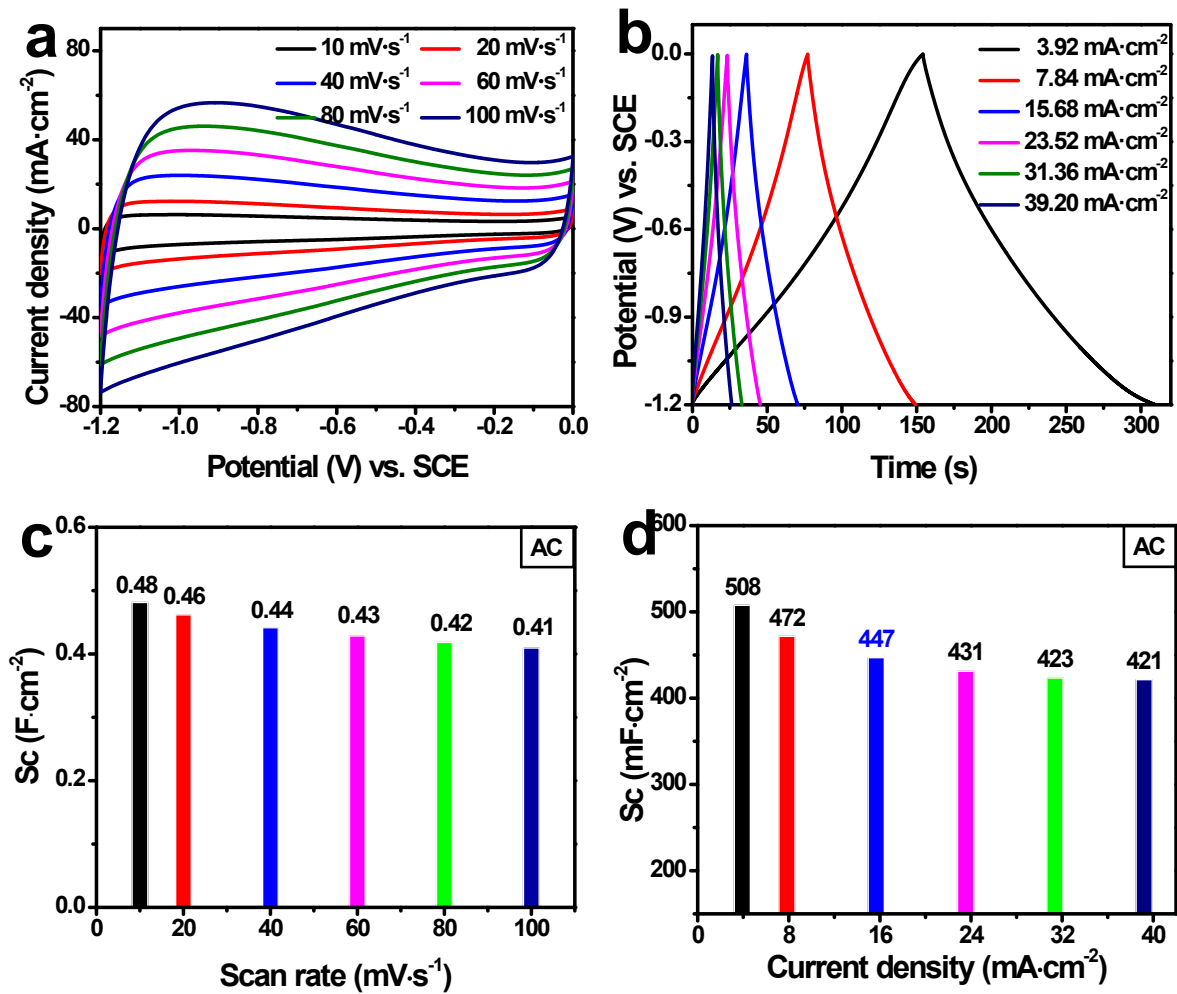

**Fig. S1** (a) and (b) are the CV and GCD curves of AC, and the corresponding specific capacitances calculated results present in (c) and (d).

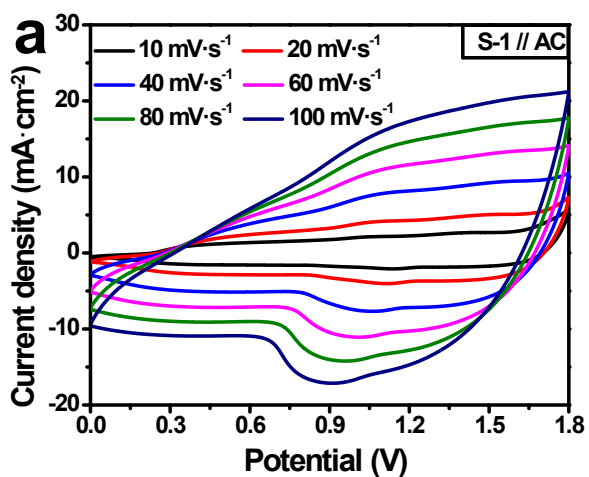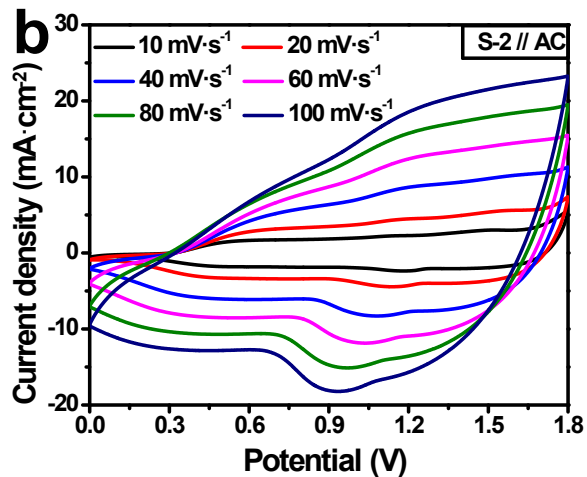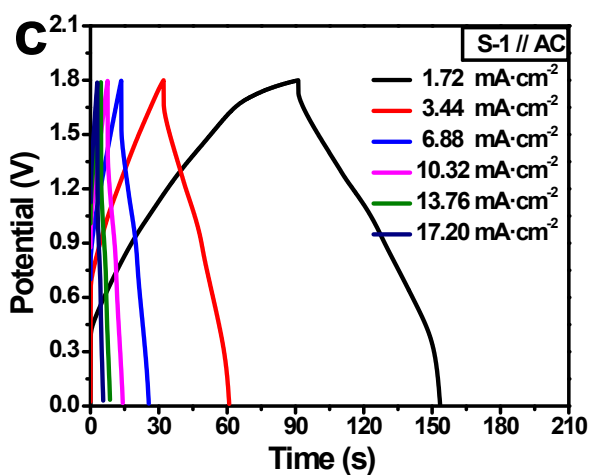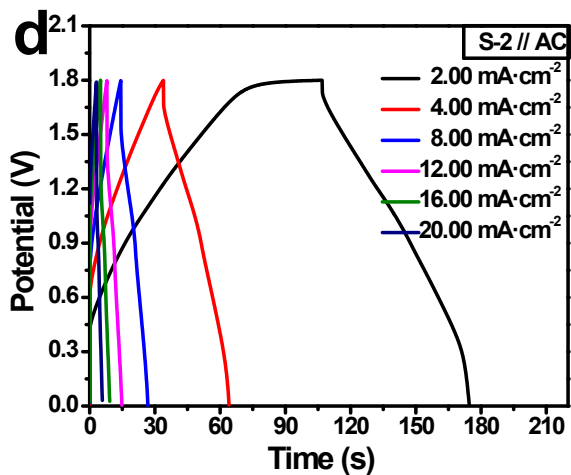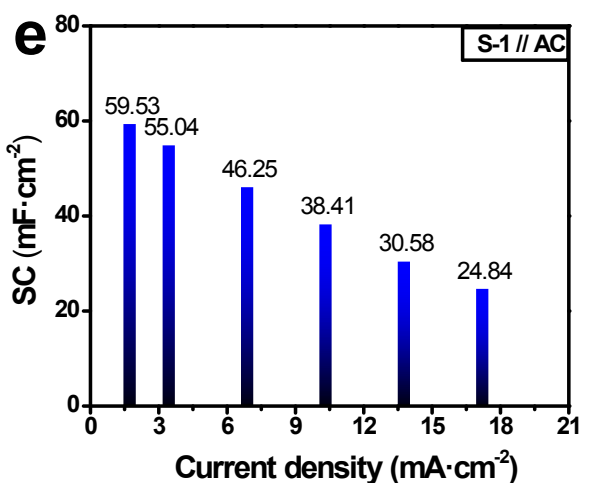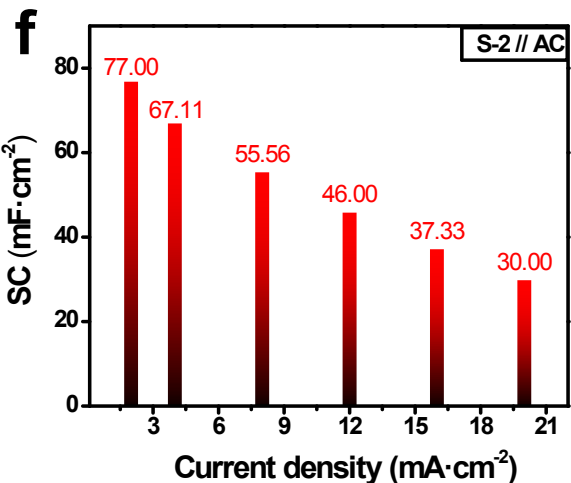

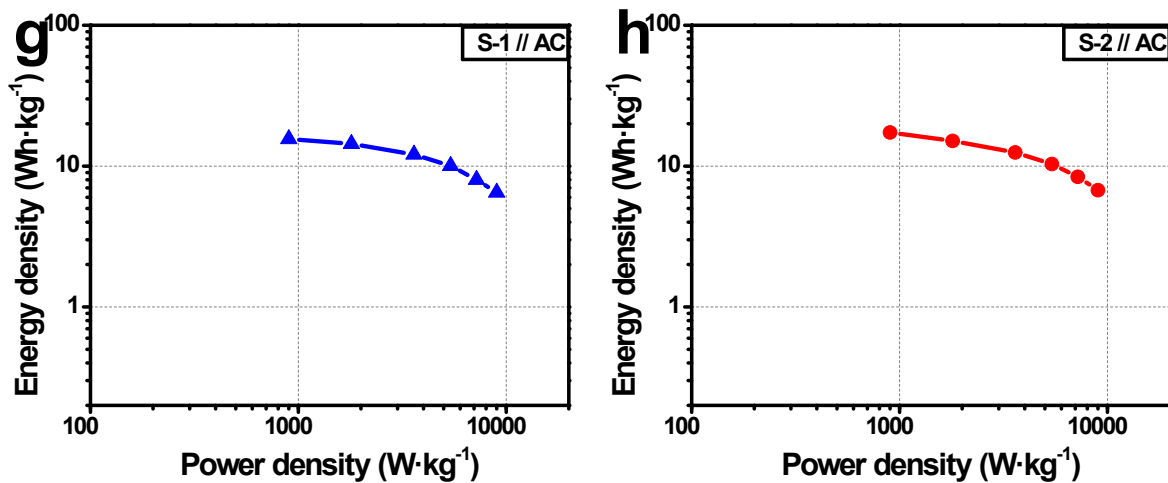

**Fig. 2S** (a) and (b) were the CV curves of S-1//AC and S-2//AC, respectively. (c) and (d) were the GCD curves of S-1//AC and S-2//AC, and the corresponding specific capacitances calculated results present in (e) and (f), respectively. (g) and (h) are the Ragone plot of S-1//AC and S-2//AC, respectively.
